# Supplementary material for: Health Education Through a Campaign and mHealth to Enhance Knowledge and Quality of Life Among Patients With Chronic Kidney Disease in Bangladesh: Protocol for a Randomized Controlled Trial
Source: PubMed Central journal article supplement (PMC8663577; doi:10.2196/30191), 2021-11-19
Supplement: resprot_v10i11e30191_app3.pdf [file resprot_v10i11e30191_app3.pdf]

**Title:** Health education through a campaign and mHealth to enhance knowledge and improve quality of life among patients with chronic kidney diseases in rural and peri-urban Bangladesh.

**Questionnaire:**

**A. Identification** (Age, gender, marital status, occupation, educational background, income/month, wealth quantile)

|                                                                          |                                              |                                         |       |                         |                                                                                                                                                                                            |                                                               |                         |                |  |  |
|--------------------------------------------------------------------------|----------------------------------------------|-----------------------------------------|-------|-------------------------|--------------------------------------------------------------------------------------------------------------------------------------------------------------------------------------------|---------------------------------------------------------------|-------------------------|----------------|--|--|
| 1. Questionnaire ID number<br>[Start with questionnaire number as '001'] |                                              |                                         |       |                         |                                                                                                                                                                                            | 7. Researcher/Interviewer ID number<br>[Use your personal ID] |                         |                |  |  |
| 2. Interview date                                                        |                                              |                                         |       |                         | 8. Interview Duration                                                                                                                                                                      |                                                               |                         |                |  |  |
|                                                                          |                                              | Day                                     | Month | Year                    |                                                                                                                                                                                            | Start                                                         | End                     | Duration (min) |  |  |
| 3. Union (name & code)                                                   |                                              | Code                                    |       |                         | 9. Staff Code                                                                                                                                                                              |                                                               |                         |                |  |  |
|                                                                          |                                              |                                         |       | 10. Status of Interview |                                                                                                                                                                                            |                                                               | 1=Complete 2=Incomplete |                |  |  |
| 4. Village name                                                          |                                              | <b>If incomplete, write the reason:</b> |       |                         |                                                                                                                                                                                            |                                                               |                         |                |  |  |
| 5. Respondent Name                                                       |                                              |                                         |       |                         |                                                                                                                                                                                            |                                                               |                         |                |  |  |
| 6. Contact no./Mob no.                                                   |                                              |                                         |       |                         |                                                                                                                                                                                            |                                                               |                         |                |  |  |
| 11. Date of birth<br>[In years]                                          |                                              |                                         |       |                         |                                                                                                                                                                                            |                                                               |                         |                |  |  |
|                                                                          |                                              | Day                                     | Month | Year                    |                                                                                                                                                                                            |                                                               |                         |                |  |  |
| 12. Gender                                                               |                                              | [Code: 1=Male, 2=Female]                |       |                         |                                                                                                                                                                                            |                                                               |                         |                |  |  |
| 13. Education                                                            | What is the highest grade of your education? |                                         |       |                         | [Code: 1=Cannot read & write, 2= Can sign only, 3= Can read only, 4= Can read & write, 5=Class I-V, 6= Class VI-X, 7= SSC, 8= HSC, 9= Bachelor, 10= master's & above, 33=Religious school] |                                                               |                         |                |  |  |
| 15. Marital Status                                                       | What is your marital status?                 |                                         |       |                         | [Code: 1=Single, 2=Married, 3=Widow, 4=Never married, 5=Separated, 6=Divorced, 7=Other (specify): _____, 77=Don't know, 88=Refused]                                                        |                                                               |                         |                |  |  |

**B. Respondent's Household [HH] information (socio-economic variables)**

|                |                                  |  |                                                                                                                                                                       |
|----------------|----------------------------------|--|-----------------------------------------------------------------------------------------------------------------------------------------------------------------------|
| 16. HH Size    | How many people live in your HH? |  | [Number only<br><b>Interviewer note</b> – This means living there continuously for the <b>past 6 months</b> ]                                                         |
| 17. Occupation | What is your primary occupation? |  | [Code: 1=Farmer, 2=Day laborer, 3=Share cropper, 4=Rickshaw/push cart puller, 5=Taxi/bus/truck/tempo driver, 6=Mill/industry worker, 7= Skilled worker, 8=Office non- |

|              |                                                                             |  |                                                                                                                                                                                                                                                                       |
|--------------|-----------------------------------------------------------------------------|--|-----------------------------------------------------------------------------------------------------------------------------------------------------------------------------------------------------------------------------------------------------------------------|
|              |                                                                             |  | executive, 9=Office executive, 10=Petty business, 11=Big business, 12=Overseas employment, 13=Boatman, 14=Fisherman, 15=Unemployed, 16=Beggar, 17=Street vendor, 18=Housewife, 19=Retired, 20=Other (specify): _____, 77=Don't know, 88=Refused]                      |
| 18.1 Income  | Who is the income earner of your HH?                                        |  | [Code: 1= Only HH head, 2= HH head and others, 3=Others] Mention your relationship with him/her _____                                                                                                                                                                 |
| 18.2 Income  | What are the main sources of your HH income?                                |  | [Code: 1= Unemployed, 2= Unpaid household work, 3= Government service, 4= Private service, 5= Agriculture labor, 6= Non-agriculture labor, 7= Agriculture production, 8=Trading agent, 9= House tutoring, 10= Remittance, 11= Pension, 12= Rental, specify if others] |
| 18.3 Income  | How much money does your household earn in every month [average in BDT]?    |  | Tk. per month                                                                                                                                                                                                                                                         |
| 18.4 Expense | How much money does your household expense in every month [average in BDT]? |  | Tk. per month                                                                                                                                                                                                                                                         |

### C. Current medical History, medication and adherence

|     |                                                                                                        |  |                                                                                                                                                |
|-----|--------------------------------------------------------------------------------------------------------|--|------------------------------------------------------------------------------------------------------------------------------------------------|
| 19. | Have you ever been diagnosed with CKD?                                                                 |  | [Code: 1=Yes, 2= No, 77=Don't know, 88=Refused]                                                                                                |
| 20. | Do you suffer any other diseases, such as hypertension, Diabetes, stroke, heart disease, obesity etc.? |  | [Code: 1=Yes, 2= No, 77=Don't know, 88=Refused]<br><br>If yes, then what was diagnosed-----<br>----<br>Mention the relationship with you _____ |
| 21. | Do you take all the prescribed medications for it?                                                     |  | [Code: 1=Yes, 2=No]                                                                                                                            |
| 22. | How many different medicines you are taking in a day?                                                  |  | [Interviewer note: Mention approx. number]                                                                                                     |
| 23. | Do you take medicine regularly?                                                                        |  | [Code: 1=Yes, 2=No]                                                                                                                            |
| 24. | Why you do not take them as prescribed?                                                                |  | [Code: 1=I cannot afford the cost, 2=Medications are not easily available, 3=I do not like to take medications, 4=I only take them             |

|     |                                                      |  |                                                                                                                                                                |
|-----|------------------------------------------------------|--|----------------------------------------------------------------------------------------------------------------------------------------------------------------|
|     |                                                      |  | when I feel that I need them, 5=I do not like the side effects of the medication, 6= I prefer alternative medicine, 7=I forget, 8= Other _____, 77=Don't know] |
| 25. | Are you having any problems taking your medications? |  | [Code: 1=Yes, 2=No], Specify if 'Yes' _____                                                                                                                    |
| 26. | Do you take any herbal medicine?                     |  | [Code: 1=Yes, 2=No], Specify if 'Yes' _____                                                                                                                    |

#### D. History of CKD

|     |                                                           |  |                                                                                                                                                                                                                                                         |
|-----|-----------------------------------------------------------|--|---------------------------------------------------------------------------------------------------------------------------------------------------------------------------------------------------------------------------------------------------------|
| 27. | How did you come to know about your CKD?                  |  | [Code: 1=In a routine medical control, 2=Screening program, 3=Emergency service, 4=Other (specify: _____), 77=Don't know, 88=Refused]                                                                                                                   |
| 28. | At what age were you diagnose as CKD?                     |  | [Code: Mention it in year / age: _____, 77=Don't know, 88=Refused]                                                                                                                                                                                      |
| 29. | Where did you confirm your first diagnosis of having CKD? |  | [Code: 1=This primary health center, 2=Other primary care clinic/physician, 3=Secondary care hospital*, 4=Tertiary care hospital*, 5=At a pharmacy/drugstore, 6=Other (specify _____), 77=Don't know, 88=Refused]<br>* manual explains what it is meant |

#### E. Behavioural questionnaire:

|     |                                                                                                  |  |                                                                                                                                                                       |
|-----|--------------------------------------------------------------------------------------------------|--|-----------------------------------------------------------------------------------------------------------------------------------------------------------------------|
| 30. | Do you smoke cigarettes?                                                                         |  | [Code: 1=Yes, 2=No] If 'yes'                                                                                                                                          |
| 31. | How many cigarettes do you smoke a day?                                                          |  | [Code: 77=Don't know, 88=Refused]<br>[Interviewer note: Mention approx. number]                                                                                       |
| 32. | How many years have you been smoking?                                                            |  | [Code: 77=Don't know, 88=Refused]<br>[Interviewer note: Mention years only]                                                                                           |
| 33. | Does anyone smoke in your house?                                                                 |  | [Code: 1=Yes, 2=No, 77=Don't know, 88=Refused]                                                                                                                        |
| 34. | Did you ever take smokeless tobacco? (Zarda, Paan, tobacco leaf, Gul, Sadapata, Paan Masala etc) |  | [Code: 1=Yes (go to next question), 2=No, 77=Don't know, 88=Refused]<br>[Interviewer note: Such as- Zarda, Paan with tobacco leaf, Gul, Sadapata, Pan masala, Nasshi] |
| 35. | How often do you take smokeless tobacco?                                                         |  | [Code: 1=Every day, 2=At least once a week, 3=At least once in the last month, 4=Not at all, 77=Don't know, 88=Refused]<br>[Interviewer note: Data of last 30 days]   |
| 36. | How many times you                                                                               |  | [Interviewer note: Mention approx.                                                                                                                                    |

|     |                                                            |  |  |       |                                                                                                                                             |
|-----|------------------------------------------------------------|--|--|-------|---------------------------------------------------------------------------------------------------------------------------------------------|
|     | take it a day?                                             |  |  |       | number]                                                                                                                                     |
| 37. | Do you take alcohol?                                       |  |  | Code: | [Code: 1=Yes, 2=No] if yes, go to the next Q.                                                                                               |
| 38. | How often do you take alcohol?                             |  |  | Code: | 1= Daily, 2= 5-6 days per week, 3= 1-4 days per week, 4= 1-3 days per month, 5= Less than once a month                                      |
| 39. | How much do you take alcohol in a day (standard drink)?    |  |  |       | Mention it in ml_____                                                                                                                       |
| 40. | What type of physical activity you are currently involved? |  |  |       | [Code: 1=Bicycling, 2=Lifting Heavy loads, 3=Swimming, 4=Walking, 5= Digging, 6= Construction work, 7= Harvesting, 8=Others _____, 10=None] |
| 41. | How often do you do physical activity?                     |  |  |       | [Code: 1=1-3 times a week, 2=3-5 times a week, 3=5-7 times a week, 4=Inconsistently, 5=None]                                                |
| 42. | How many hours do you sleep in a day?                      |  |  |       | Mention it in hours_____                                                                                                                    |
| 43. | Do you have any sleeping disturbance?                      |  |  |       | [Code: 1=Yes (go to next question), 2=No, 77=Don't know, 88=Refused]                                                                        |

### F. Family History

|     |                                                                                                                       |  |  |  |                                                                                                                                              |
|-----|-----------------------------------------------------------------------------------------------------------------------|--|--|--|----------------------------------------------------------------------------------------------------------------------------------------------|
| 44. | Have any of your family members ever been diagnosed with CKD?                                                         |  |  |  | [Code: 1=Yes, 2= No, 77=Don't know, 88=Refused]                                                                                              |
| 45. | Does your family have a history of diagnosed such as hypertension, Diabetes, obesity etc.? If yes, who was diagnosed? |  |  |  | [Code: 1=Yes, 2= No, 77=Don't know, 88=Refused]<br><br>If yes, then what was diagnosed-----<br>---<br>Mention the relationship with you_____ |
| 46. | Have any of your family members ever been hospitalized due to complication of CKD related complication?               |  |  |  | [Code: 1=Yes, 2= No, 77=Don't know, 88=Refused]                                                                                              |

### G. Clinical Measures

|                     |  |  |  |  |                |                           |  |  |  |  |  |      |
|---------------------|--|--|--|--|----------------|---------------------------|--|--|--|--|--|------|
| Height              |  |  |  |  | <b>Cm</b>      | Blood pressure            |  |  |  |  |  |      |
| Weight              |  |  |  |  | <b>Kg</b>      | Measurement 1 (Right arm) |  |  |  |  |  | mmHg |
| Waist circumference |  |  |  |  | <b>Cm</b>      | Measurement 2 (Right arm) |  |  |  |  |  | mmHg |
| Hip circumference   |  |  |  |  | <b>Cm</b>      | Measurement 1 (Left arm)  |  |  |  |  |  | mmHg |
| Pulse               |  |  |  |  | <b>Per/min</b> | Measurement 2 (Left arm)  |  |  |  |  |  | mmHg |

**H. Medical Record and Recording sheet:**

I would like to do some investigations to see some of your results for Chronic kidney diseases.

This will help us to understand the diagnosis and risk factors of CKD. I would like to remind you that this will be strictly confidential.

| Test                         | Value  | Test         | Value | Date of test<br>(DD/MM/YYYY<br>Y) |
|------------------------------|--------|--------------|-------|-----------------------------------|
| <b>Blood</b>                 |        |              |       |                                   |
| Fasting blood sugar<br>(FBS) | mmol/L | S.Creatinine | mg/dl |                                   |
| S.Cholesterol                | mg/dl  | HDL-c        | mg/dl |                                   |
| S.Triglyceride               | mg/dl  | S.Albumin    | gm/dl |                                   |
| Hb                           | g/dl   |              |       |                                   |
| Blood urea nitrogen<br>(BUN) |        | S.Uric acid  |       |                                   |
| <b>Urine sample</b>          |        |              |       |                                   |
| ACR                          |        |              | mg/gm |                                   |
| <b>Salinity</b>              |        |              |       |                                   |
| Food salinity                |        |              |       |                                   |
| Urinary salinity             |        |              |       |                                   |

## I. Chronic Kidney Disease Knowledge Questionnaire

For Sections, 1-5, please answer 'True', 'False' or 'I don't know' to the following questions:

### Section 1

| No | Question                                                                           | True                     | False                    | I don't know             |
|----|------------------------------------------------------------------------------------|--------------------------|--------------------------|--------------------------|
| 1  | A person can lead a normal life with one healthy kidney.                           | <input type="checkbox"/> | <input type="checkbox"/> | <input type="checkbox"/> |
| 2  | Herbal supplements can be effective in treating chronic kidney disease.            | <input type="checkbox"/> | <input type="checkbox"/> | <input type="checkbox"/> |
| 3  | Certain medications can help to slow-down the worsening of chronic kidney disease. | <input type="checkbox"/> | <input type="checkbox"/> | <input type="checkbox"/> |

### Section 2 What functions do the kidney perform in our body?

| No | Question                                           | True                     | False                    | I don't know             |
|----|----------------------------------------------------|--------------------------|--------------------------|--------------------------|
| 4  | The kidneys make urine.                            | <input type="checkbox"/> | <input type="checkbox"/> | <input type="checkbox"/> |
| 5  | The kidneys clean blood.                           | <input type="checkbox"/> | <input type="checkbox"/> | <input type="checkbox"/> |
| 6  | The kidneys help to keep blood sugar level normal. | <input type="checkbox"/> | <input type="checkbox"/> | <input type="checkbox"/> |
| 7  | The kidneys help to maintain blood pressure.       | <input type="checkbox"/> | <input type="checkbox"/> | <input type="checkbox"/> |
| 8  | The kidneys help to breakdown protein in the body. | <input type="checkbox"/> | <input type="checkbox"/> | <input type="checkbox"/> |
| 9  | The kidneys help to keep the bones healthy.        | <input type="checkbox"/> | <input type="checkbox"/> | <input type="checkbox"/> |

### Section 3 Which of the following are commonly used to determine the health of your kidneys?

| No | Question                   | True                     | False                    | I don't know             |
|----|----------------------------|--------------------------|--------------------------|--------------------------|
| 10 | A blood test.              | <input type="checkbox"/> | <input type="checkbox"/> | <input type="checkbox"/> |
| 11 | A urine test.              | <input type="checkbox"/> | <input type="checkbox"/> | <input type="checkbox"/> |
| 12 | A faecal (poo) test.       | <input type="checkbox"/> | <input type="checkbox"/> | <input type="checkbox"/> |
| 13 | Blood pressure monitoring. | <input type="checkbox"/> | <input type="checkbox"/> | <input type="checkbox"/> |

### Section 4 What are the risk factors for chronic kidney disease?

| No | Question                                              | True                     | False                    | I don't know             |
|----|-------------------------------------------------------|--------------------------|--------------------------|--------------------------|
| 14 | Diabetes.                                             | <input type="checkbox"/> | <input type="checkbox"/> | <input type="checkbox"/> |
| 15 | Being female.                                         | <input type="checkbox"/> | <input type="checkbox"/> | <input type="checkbox"/> |
| 16 | High blood pressure.                                  | <input type="checkbox"/> | <input type="checkbox"/> | <input type="checkbox"/> |
| 17 | Heart problems such as heart failure or heart attack. | <input type="checkbox"/> | <input type="checkbox"/> | <input type="checkbox"/> |
| 18 | Excess stress.                                        | <input type="checkbox"/> | <input type="checkbox"/> | <input type="checkbox"/> |
| 19 | Obesity.                                              | <input type="checkbox"/> | <input type="checkbox"/> | <input type="checkbox"/> |

### Section 5 What are the signs and symptoms that a person might have if they have advanced chronic kidney disease or kidney failure?

| No | Question                                                       | True                     | False                    | I don't know             |
|----|----------------------------------------------------------------|--------------------------|--------------------------|--------------------------|
| 20 | Water retention (excess water in the body) (e.g. edema in leg) | <input type="checkbox"/> | <input type="checkbox"/> | <input type="checkbox"/> |
| 21 | Fever.                                                         | <input type="checkbox"/> | <input type="checkbox"/> | <input type="checkbox"/> |
| 22 | Nausea/vomiting.                                               | <input type="checkbox"/> | <input type="checkbox"/> | <input type="checkbox"/> |
| 23 | Loss of appetite.                                              | <input type="checkbox"/> | <input type="checkbox"/> | <input type="checkbox"/> |
| 24 | Increased fatigue (tiredness).                                 | <input type="checkbox"/> | <input type="checkbox"/> | <input type="checkbox"/> |

## J. Quality of Life questionnaire-

|                                                                                                                                                                                                                                  |                                                                                          |                                                                                                                                                                                                                                                                                                                                                                                                                       |
|----------------------------------------------------------------------------------------------------------------------------------------------------------------------------------------------------------------------------------|------------------------------------------------------------------------------------------|-----------------------------------------------------------------------------------------------------------------------------------------------------------------------------------------------------------------------------------------------------------------------------------------------------------------------------------------------------------------------------------------------------------------------|
| 1                                                                                                                                                                                                                                | MOBILITY                                                                                 | <p>1=I have no problems in walking about <input type="checkbox"/></p> <p>2= I have slight problems in walking about <input type="checkbox"/></p> <p>3= I have moderate problems in walking about <input type="checkbox"/></p> <p>4= I have severe problems in walking about <input type="checkbox"/></p> <p>5= I am unable to walk about <input type="checkbox"/></p>                                                 |
| 2                                                                                                                                                                                                                                | SELF-CARE                                                                                | <p>1=have no problems washing or dressing myself <input type="checkbox"/></p> <p>2= I have slight problems washing or dressing myself <input type="checkbox"/></p> <p>3= I have moderate problems washing or dressing myself <input type="checkbox"/></p> <p>4= I have severe problems washing or dressing myself <input type="checkbox"/></p> <p>5= I am unable to wash or dress myself <input type="checkbox"/></p> |
| 3                                                                                                                                                                                                                                | USUAL ACTIVITIES<br>(e.g. work, study,<br>housework,<br>family or leisure<br>activities) | <p>1=I have no problems doing my usual activities <input type="checkbox"/></p> <p>2= I have slight problems doing my usual activities <input type="checkbox"/></p> <p>3= I have moderate problems doing my usual activities <input type="checkbox"/></p> <p>4= I have severe problems doing my usual activities <input type="checkbox"/></p> <p>5= I am unable to do my usual activities <input type="checkbox"/></p> |
| 4                                                                                                                                                                                                                                | PAIN / DISCOMFORT                                                                        | <p>1=I have no pain or discomfort <input type="checkbox"/></p> <p>2= I have slight pain or discomfort <input type="checkbox"/></p> <p>3= I have moderate pain or discomfort <input type="checkbox"/></p> <p>4= I have severe pain or discomfort <input type="checkbox"/></p> <p>5= I have extreme pain or discomfort <input type="checkbox"/></p>                                                                     |
| 5                                                                                                                                                                                                                                | ANXIETY /<br>DEPRESSION                                                                  | <p>1=I am not anxious or depressed <input type="checkbox"/></p> <p>2= I am slightly anxious or depressed <input type="checkbox"/></p> <p>3= I am moderately anxious or depressed <input type="checkbox"/></p> <p>4= I am severely anxious or depressed <input type="checkbox"/></p> <p>5= I am extremely anxious or depressed <input type="checkbox"/></p>                                                            |
| <p>NB: There should be only ONE response for each dimension</p> <p>NB: Missing values can be coded as '9'.</p> <p>NB: Ambiguous values (e.g. 2 boxes are ticked for a single dimension) should be treated as missing values.</p> |                                                                                          |                                                                                                                                                                                                                                                                                                                                                                                                                       |
